# Supplementary material for: Characteristics of patients with giant cell arteritis who experience visual symptoms
Source: Springer Nature journal article supplement (doi:10.1007/s00296-019-04422-5), 2019-08-22
Supplement: MOESM1 [file 17093292]

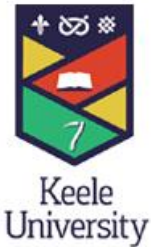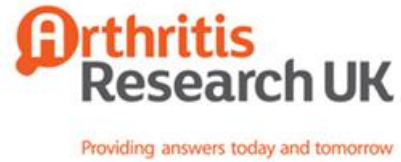

# **The Impact of Giant Cell Arteritis (GCA) Study**

Arthritis Research UK Primary Care Centre

# Instructions for completing this questionnaire

Thank you for taking part in ‘**The Impact of Giant Cell Arteritis (GCA)**’ study.

We want to find out more about Giant Cell Arteritis (GCA) (also known as Temporal Arteritis) so that we can better understand what happens to people who have it. The following questions are about the GCA that you were previously diagnosed with, how it affects you and how you and your doctor manage it.

Please answer **all** of the questions, **even if you have no current problems with your health**. Unless stated, most questions can be answered by putting a cross in a box, like this:

When you have finished, please check that all questions have been answered and then return the completed questionnaire back to us **as soon as you can**. A pre-paid envelope has been provided and you **do not** need a stamp.

The answers you give in the questionnaire will be treated in the strictest confidence. Whether you take part in this research or not, your right to use health services at your practice or elsewhere will not be affected.

Further details about this project are available in the Participant Information Sheet enclosed. If you have any more questions please contact the **Study Coordinator, Sarah Lawton** on **01782 734965** during office hours or email [s.a.lawton@keele.ac.uk](mailto:s.a.lawton@keele.ac.uk) mentioning your name or ID number (which can be found on the back of your questionnaire).

**Thank you for taking part in this study.**

## Section A: About your GCA diagnosis

---

1. How old were you when your doctor **first** said you had GCA?  
(Don't worry if you are not sure, please try to give us a rough idea)

Age  years

2. For approximately how long had you had your GCA symptoms when you **first** visited your doctor?  
(Please write in the total number of days, weeks or months)

|                      |               |                                                            |
|----------------------|---------------|------------------------------------------------------------|
| <input type="text"/> | <b>Days</b>   | } Please only enter a number in <b>one</b> of these boxes. |
| <input type="text"/> | <b>Weeks</b>  |                                                            |
| <input type="text"/> | <b>Months</b> |                                                            |

3. Approximately how long did it take between visiting your doctor for the **first** time with your GCA symptoms and getting a **final** diagnosis of GCA?  
(Please write in the total number of days, weeks or months)

|                      |               |                                                            |
|----------------------|---------------|------------------------------------------------------------|
| <input type="text"/> | <b>Days</b>   | } Please only enter a number in <b>one</b> of these boxes. |
| <input type="text"/> | <b>Weeks</b>  |                                                            |
| <input type="text"/> | <b>Months</b> |                                                            |

4. Who diagnosed your GCA?  
(Please put a cross in as many boxes that apply to you)

- a. GP.....
- b. Rheumatologist.....
- c. Ophthalmologist.....
- d. Geriatrician.....
- e. Other, please state;.....

.....

5. How many times did you visit the various health professionals listed below about your GCA symptoms until you were diagnosed with GCA?  
*(Please put a cross in one box in each row)*

| Health professional |                                   | Number of visits until your GCA diagnosis |                          |                          |                          |                          |
|---------------------|-----------------------------------|-------------------------------------------|--------------------------|--------------------------|--------------------------|--------------------------|
|                     |                                   | Never                                     | Once                     | Twice                    | 3 times                  | 4 or more times          |
| a                   | GP                                | <input type="checkbox"/>                  | <input type="checkbox"/> | <input type="checkbox"/> | <input type="checkbox"/> | <input type="checkbox"/> |
| b                   | Rheumatologist                    | <input type="checkbox"/>                  | <input type="checkbox"/> | <input type="checkbox"/> | <input type="checkbox"/> | <input type="checkbox"/> |
| c                   | Ophthalmologist                   | <input type="checkbox"/>                  | <input type="checkbox"/> | <input type="checkbox"/> | <input type="checkbox"/> | <input type="checkbox"/> |
| d                   | Geriatrician                      | <input type="checkbox"/>                  | <input type="checkbox"/> | <input type="checkbox"/> | <input type="checkbox"/> | <input type="checkbox"/> |
| e                   | Vascular surgeon                  | <input type="checkbox"/>                  | <input type="checkbox"/> | <input type="checkbox"/> | <input type="checkbox"/> | <input type="checkbox"/> |
| f                   | Other, please state.....<br>..... | <input type="checkbox"/>                  | <input type="checkbox"/> | <input type="checkbox"/> | <input type="checkbox"/> | <input type="checkbox"/> |

6. Which of the following tests did you have to help diagnose your GCA?  
*Please put a cross in as many boxes that apply to you)*

- a. Blood test.....
- b. Temporal artery biopsy.....
- c. Scalp ultrasound.....
- d. MRI.....
- e. PET-Scan.....
- f. Other, please state;.....
- .....

7. Have you experienced any of the symptoms listed below, **in relation to your GCA**, at the different times stated?  
*(Please put a cross in as many boxes that apply to you)*

|   |                                                             | <b>Before</b> diagnosis of GCA this symptom prompted me to see my doctor | <b>Currently</b> experiencing | <b>Ever</b> experienced since my GCA diagnosis |
|---|-------------------------------------------------------------|--------------------------------------------------------------------------|-------------------------------|------------------------------------------------|
| a | Headache / head pain                                        | <input type="checkbox"/>                                                 | <input type="checkbox"/>      | <input type="checkbox"/>                       |
| b | Scalp tenderness<br>e.g. when brushing hair                 | <input type="checkbox"/>                                                 | <input type="checkbox"/>      | <input type="checkbox"/>                       |
| c | Pain or difficulty chewing<br>(e.g. when eating meat/bread) | <input type="checkbox"/>                                                 | <input type="checkbox"/>      | <input type="checkbox"/>                       |
| d | Double vision                                               | <input type="checkbox"/>                                                 | <input type="checkbox"/>      | <input type="checkbox"/>                       |
| e | Temporary vision problems                                   | <input type="checkbox"/>                                                 | <input type="checkbox"/>      | <input type="checkbox"/>                       |
| f | Permanent vision problems                                   | <input type="checkbox"/>                                                 | <input type="checkbox"/>      | <input type="checkbox"/>                       |
| g | Shoulder pain or stiffness                                  | <input type="checkbox"/>                                                 | <input type="checkbox"/>      | <input type="checkbox"/>                       |
| h | Hip pain or stiffness                                       | <input type="checkbox"/>                                                 | <input type="checkbox"/>      | <input type="checkbox"/>                       |
| i | High temperature                                            | <input type="checkbox"/>                                                 | <input type="checkbox"/>      | <input type="checkbox"/>                       |
| j | Weight loss                                                 | <input type="checkbox"/>                                                 | <input type="checkbox"/>      | <input type="checkbox"/>                       |
| k | Loss of appetite                                            | <input type="checkbox"/>                                                 | <input type="checkbox"/>      | <input type="checkbox"/>                       |
| l | Tiredness/fatigue                                           | <input type="checkbox"/>                                                 | <input type="checkbox"/>      | <input type="checkbox"/>                       |
| m | Pain in upper body when walking                             | <input type="checkbox"/>                                                 | <input type="checkbox"/>      | <input type="checkbox"/>                       |
| n | Pain in lower body when walking                             | <input type="checkbox"/>                                                 | <input type="checkbox"/>      | <input type="checkbox"/>                       |
| o | Ear pain                                                    | <input type="checkbox"/>                                                 | <input type="checkbox"/>      | <input type="checkbox"/>                       |
| p | Toothache                                                   | <input type="checkbox"/>                                                 | <input type="checkbox"/>      | <input type="checkbox"/>                       |
| q | Dry cough                                                   | <input type="checkbox"/>                                                 | <input type="checkbox"/>      | <input type="checkbox"/>                       |
| r | Hoarseness                                                  | <input type="checkbox"/>                                                 | <input type="checkbox"/>      | <input type="checkbox"/>                       |
| s | Other, please specify:                                      | .....                                                                    | .....                         | .....                                          |

8. Please list in rank-order the **three** most important symptoms to you **before** your GCA diagnosis.

1. ....

2. ....

3. ....

9. Please list in rank-order the **three** most important symptoms to you **after** your GCA diagnosis.

1. ....

2. ....

3. ....

## Section B: About your GCA medication

---

1. Have you ever taken prednisolone (steroid medication) for your GCA?  
Yes.....  No.....  If **'No'**, please go to question 7 on page 8.
2. Are you still taking prednisolone?  
Yes.....  If **'Yes'**, what is your daily dose? \_\_\_\_\_ milligrams (mg)  
No.....  If **'No'**, for about how long did you take prednisolone?  
\_\_\_\_\_ months \_\_\_\_\_ years
3. When you were first prescribed prednisolone for your GCA, what was your starting dose?  
*(Don't worry if you can't remember, please try to give us a rough idea)*  
 milligrams (mg)
4. After you first started taking prednisolone, how long did it take for your symptoms to improve?  
*(Please put a cross in one box only)*
- |                          |                          |                          |                          |                          |                             |
|--------------------------|--------------------------|--------------------------|--------------------------|--------------------------|-----------------------------|
| 1 day                    | 2-3 days                 | 4-6 days                 | Within a week            | Within 1-2 weeks         | My symptoms did not improve |
| <input type="checkbox"/>    |

5. Have you ever been given a steroid card? It looks like this:

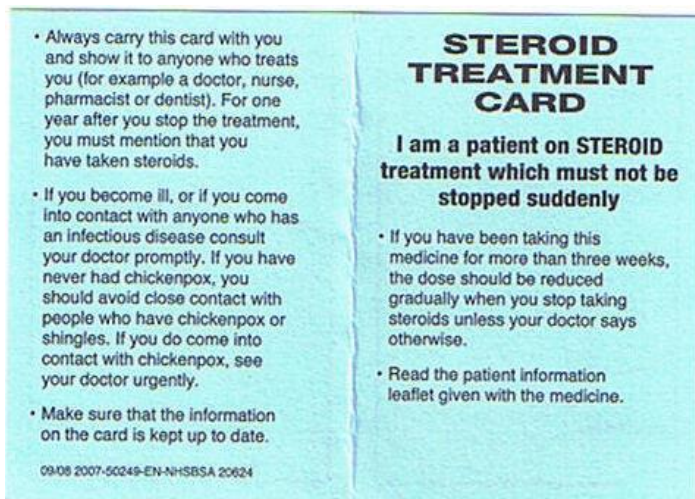

Yes.....

No.....

6. Have you ever increased or decreased your steroid dose yourself without going to see your doctor?

Yes.....

No.....

If 'Yes', please specify how you altered your steroid dose;

Increased dose.....

by

milligrams (mg)

Decreased dose.....

Please specify why you altered your dose.....  
.....



7. We are interested in some of the other medications you may take in **connection** with your GCA.

Please put a cross in the first column if you took any of the listed products **before** you were diagnosed with GCA and put a cross in the second column to indicate if you take any of the products listed **now**.

*(Please put a cross in as many boxes that apply to you)*

| Medication |                                                                                      | Took before GCA diagnosis | Taking Now               |
|------------|--------------------------------------------------------------------------------------|---------------------------|--------------------------|
| a          | Paracetamol                                                                          | <input type="checkbox"/>  | <input type="checkbox"/> |
| b          | Paracetamol and codeine (e.g. co-codamol)                                            | <input type="checkbox"/>  | <input type="checkbox"/> |
| c          | Non-steroidal anti-inflammatories (e.g. ibuprofen, diclofenac)                       | <input type="checkbox"/>  | <input type="checkbox"/> |
| d          | Strong painkillers on prescription (e.g. tramadol)                                   | <input type="checkbox"/>  | <input type="checkbox"/> |
| e          | Medicine to protect your stomach and digestive system (e.g.omeprazole, lansoprazole) | <input type="checkbox"/>  | <input type="checkbox"/> |
| f          | Calcium supplements                                                                  | <input type="checkbox"/>  | <input type="checkbox"/> |
| g          | Vitamin D supplements                                                                | <input type="checkbox"/>  | <input type="checkbox"/> |
| h          | Medicines for osteoporosis (e.g. alendronate, risedronate, strontium)                | <input type="checkbox"/>  | <input type="checkbox"/> |
| i          | Azathioprine                                                                         | <input type="checkbox"/>  | <input type="checkbox"/> |
| j          | Methotrexate                                                                         | <input type="checkbox"/>  | <input type="checkbox"/> |
| k          | Leflunomide                                                                          | <input type="checkbox"/>  | <input type="checkbox"/> |
| l          | Cyclophosphamide                                                                     | <input type="checkbox"/>  | <input type="checkbox"/> |
| m          | Tocilizumab                                                                          | <input type="checkbox"/>  | <input type="checkbox"/> |
| n          | Other, please specify:.....                                                          | <input type="checkbox"/>  | <input type="checkbox"/> |
|            | .....                                                                                | <input type="checkbox"/>  | <input type="checkbox"/> |

8. Please indicate below whether you have ever experienced any of these since you started medication for your GCA?  
(Please put a cross in as many boxes that apply to you)

- a Weight gain.....
- b Bruising.....
- c Osteoporosis and/or fractures.....
- d Thinning of the skin.....
- e Bruising more easily.....
- f Muscle weakness.....
- g Depression.....
- h Moodiness.....
- i Change in shape of face.....
- j Change in shape of body.....
- k Sleep disturbance.....
- l Indigestion.....
- m Ankle swelling.....
- n Thrush.....
- o Infections.....
- p Increased body hair.....
- q Tremor/shaking.....

## Section C: About your other treatments for GCA

---

1. Have you tried any other treatments for your GCA?  
(Please put a cross in the box for any treatments you have tried)

- a Acupuncture.....
- b Aromatherapy.....
- c Herbal medicine.....
- d Homeopathy.....
- e Hydrotherapy.....
- f Massage.....

2. Have you tried any treatments, other than those mentioned above, for your GCA?

Yes.....  No.....

If 'Yes', please specify:.....  
.....  
.....

3. Are there any treatments that you think might have helped, or you would like to try, for your GCA?

Yes.....  No.....

If 'Yes', please specify:.....  
.....  
.....

4. Have you ever had a bone density/DEXA scan?

Yes.....  No.....

If 'Yes', was this...

Before GCA diagnosis.....  After GCA diagnosis.....

I've had one before and after GCA diagnosis.....

## Section D: Information you received about GCA

---

1. Has your doctor ever given you any written information about GCA?

Yes.....  No.....

If 'Yes', did you find this useful?

Yes.....  No.....

2. Have you (or a friend or family member) searched on the internet for information about GCA?

Yes.....  No.....  I don't have access to the internet.....

If 'Yes', which websites did you look at?

*(Please put a cross in as many boxes that apply to you)*

| Arthritis<br>Research<br>UK | Arthritis<br>Care        | NHS<br>Choices           | Patient.co.uk            | PMRGCAuk<br>.com         | Netdoctor                | Other                    |
|-----------------------------|--------------------------|--------------------------|--------------------------|--------------------------|--------------------------|--------------------------|
| <input type="checkbox"/>    | <input type="checkbox"/> | <input type="checkbox"/> | <input type="checkbox"/> | <input type="checkbox"/> | <input type="checkbox"/> | <input type="checkbox"/> |

If 'Other', please specify:.....

.....

3. Have you ever contacted a patient support group e.g. PMR-GCA uk?

Yes.....  No.....

4. How often do you need someone to help you when you read instructions, pamphlets, or other written material from your doctor or pharmacy?

*(Please put a cross in one box only)*

|                          |                          |                          |                          |                          |
|--------------------------|--------------------------|--------------------------|--------------------------|--------------------------|
| Never                    | Rarely                   | Sometimes                | Often                    | Always                   |
| <input type="checkbox"/> |

## Section E: Your general health

Please answer every question in this section. Some questions may look similar to others but each one is different. Please take the time to read and answer each question carefully by placing a **cross in the box** of your choice.

1. In general, would you say your health is.....  
(Please put a cross in one box only)

|                          |                          |                          |                          |                          |
|--------------------------|--------------------------|--------------------------|--------------------------|--------------------------|
| Excellent                | Very good                | Good                     | Fair                     | Poor                     |
| <input type="checkbox"/> |

2. The following questions are about activities you might do during a typical day. **Does your GCA now limit you** in these activities? If so, how much?  
(Please put a cross in one box in each row)

|   |                                                                                                        | Yes, limited a lot       | Yes, limited a little    | No, not limited at all   |
|---|--------------------------------------------------------------------------------------------------------|--------------------------|--------------------------|--------------------------|
| a | <b>Moderate activities</b> , such as moving a table, pushing a vacuum cleaner, bowling or playing golf | <input type="checkbox"/> | <input type="checkbox"/> | <input type="checkbox"/> |
| b | Climbing <b>several</b> flights of stairs                                                              | <input type="checkbox"/> | <input type="checkbox"/> | <input type="checkbox"/> |

3. During the **past 4 weeks**, how much of the time have you had any of the following problems with your work or other regular daily activities **as a result of your physical health?**  
(Please put a cross in one box in each row)

|   |                                                                          | All of the time          | Most of the time         | Some of the time         | A little of the time     | None of the time         |
|---|--------------------------------------------------------------------------|--------------------------|--------------------------|--------------------------|--------------------------|--------------------------|
| a | <b>Accomplished less</b> than you would like                             | <input type="checkbox"/> |
| b | Were <b>limited</b> in the kind of work or other activities you could do | <input type="checkbox"/> |

4. During the **past 4 weeks**, how much of the time have you had any of the following problems with your work or other regular daily activities as a result of any emotional problems (such as feeling depressed or anxious)?  
(Please put a cross in one box in each row)

|   |                                                        | All of the time          | Most of the time         | Some of the time         | A little of the time     | None of the time         |
|---|--------------------------------------------------------|--------------------------|--------------------------|--------------------------|--------------------------|--------------------------|
| a | <b>Accomplished less</b> than you would like           | <input type="checkbox"/> |
| b | Did work or other activities less carefully than usual | <input type="checkbox"/> |

5. During the **past 4 weeks**, how much did **pain** interfere with your normal work (including both work outside the home and housework)?  
(Please put a cross in one box only)

Not at all                  A little bit                  Moderately                  Quite a bit                  Extremely

                                                                                                                                      

6. These questions are about how you feel and how things have been with you during the **past 4 weeks**. For each question, please give the one answer that comes closest to the way you have been feeling.  
(Please put a cross in one box in each row)

**How much of the time during the past 4 weeks...**

|   |                                    | All of the time          | Most of the time         | Some of the time         | A little of the time     | None of the time         |
|---|------------------------------------|--------------------------|--------------------------|--------------------------|--------------------------|--------------------------|
| a | Have you felt calm and peaceful?   | <input type="checkbox"/> |
| b | Did you have a lot of energy?      | <input type="checkbox"/> |
| c | Have you felt downhearted and low? | <input type="checkbox"/> |

7. During the **past 4 weeks**, how much of the time has your **physical health or emotional problems** interfered with your social activities (like visiting with friends, relatives, etc.)?  
*(Please put a cross in one box only)*

|                          |                          |                          |                          |                          |
|--------------------------|--------------------------|--------------------------|--------------------------|--------------------------|
| All of the time          | Most of the time         | Some of the time         | A little of the time     | None of the time         |
| <input type="checkbox"/> |

8. Over the **last 2 weeks** how often have you been bothered by the following problems?  
*(Please put a cross in one box in each row)*

|   |                                                   | Not at all               | On several days          | On more than half the days | Nearly every day         |
|---|---------------------------------------------------|--------------------------|--------------------------|----------------------------|--------------------------|
| a | Feel nervous, anxious or on the edge              | <input type="checkbox"/> | <input type="checkbox"/> | <input type="checkbox"/>   | <input type="checkbox"/> |
| b | Not being able to stop or control worrying        | <input type="checkbox"/> | <input type="checkbox"/> | <input type="checkbox"/>   | <input type="checkbox"/> |
| c | Worrying too much about different things          | <input type="checkbox"/> | <input type="checkbox"/> | <input type="checkbox"/>   | <input type="checkbox"/> |
| d | Trouble relaxing                                  | <input type="checkbox"/> | <input type="checkbox"/> | <input type="checkbox"/>   | <input type="checkbox"/> |
| e | Being so restless that it is hard to sit still    | <input type="checkbox"/> | <input type="checkbox"/> | <input type="checkbox"/>   | <input type="checkbox"/> |
| f | Becoming easily annoyed or irritable              | <input type="checkbox"/> | <input type="checkbox"/> | <input type="checkbox"/>   | <input type="checkbox"/> |
| g | Feeling afraid as if something awful might happen | <input type="checkbox"/> | <input type="checkbox"/> | <input type="checkbox"/>   | <input type="checkbox"/> |

9. Still thinking about the **last 2 weeks**, how often have you been bothered by any of the following problems?  
*(Please put a cross in one box in each row)*

|   |                                                                                                                                                                               | Not at all               | Several days             | More than half of the days | Nearly every day         |
|---|-------------------------------------------------------------------------------------------------------------------------------------------------------------------------------|--------------------------|--------------------------|----------------------------|--------------------------|
| a | Little interest or pleasure in doing things.....                                                                                                                              | <input type="checkbox"/> | <input type="checkbox"/> | <input type="checkbox"/>   | <input type="checkbox"/> |
| b | Feeling down, depressed, or hopeless.                                                                                                                                         | <input type="checkbox"/> | <input type="checkbox"/> | <input type="checkbox"/>   | <input type="checkbox"/> |
| c | Trouble falling or staying asleep, or sleeping too much.....                                                                                                                  | <input type="checkbox"/> | <input type="checkbox"/> | <input type="checkbox"/>   | <input type="checkbox"/> |
| d | Feeling tired or having little energy...                                                                                                                                      | <input type="checkbox"/> | <input type="checkbox"/> | <input type="checkbox"/>   | <input type="checkbox"/> |
| e | Poor appetite or overeating.....                                                                                                                                              | <input type="checkbox"/> | <input type="checkbox"/> | <input type="checkbox"/>   | <input type="checkbox"/> |
| f | Feeling bad about yourself or that you are a failure or have let yourself or your family down.....                                                                            | <input type="checkbox"/> | <input type="checkbox"/> | <input type="checkbox"/>   | <input type="checkbox"/> |
| g | Trouble concentrating on things, such as reading the newspaper or watching television.....                                                                                    | <input type="checkbox"/> | <input type="checkbox"/> | <input type="checkbox"/>   | <input type="checkbox"/> |
| h | Moving or speaking so slowly that other people could have noticed? Or the opposite – being so fidgety or restless that you have been moving around a lot more than usual..... | <input type="checkbox"/> | <input type="checkbox"/> | <input type="checkbox"/>   | <input type="checkbox"/> |
| i | Thoughts that you would be better off dead or of hurting yourself in some way.....                                                                                            | <input type="checkbox"/> | <input type="checkbox"/> | <input type="checkbox"/>   | <input type="checkbox"/> |



10. How true do you find each statement below. In the **past 4 weeks** I have found that...

(Please put a cross in one box in each row)

|   |                                                                       | Not at all               | A little bit             | Some what                | Quite a bit              | Very Much                |
|---|-----------------------------------------------------------------------|--------------------------|--------------------------|--------------------------|--------------------------|--------------------------|
| a | I feel fatigued.....                                                  | <input type="checkbox"/> |
| b | I feel weak all over.....                                             | <input type="checkbox"/> |
| c | I feel listless (“washed out”).....                                   | <input type="checkbox"/> |
| d | I feel tired.....                                                     | <input type="checkbox"/> |
| e | I have trouble <b>starting</b> things because I’m tired.....          | <input type="checkbox"/> |
| f | I have trouble <b>finishing</b> things because I’m tired.....         | <input type="checkbox"/> |
| g | I have energy.....                                                    | <input type="checkbox"/> |
| h | I am able to do my usual activities...                                | <input type="checkbox"/> |
| i | I need to sleep during the day.....                                   | <input type="checkbox"/> |
| j | I am too tired to eat.....                                            | <input type="checkbox"/> |
| k | I need help doing my usual activities.....                            | <input type="checkbox"/> |
| l | I am frustrated by being too tired to do the things I want to do..... | <input type="checkbox"/> |
| m | I have to limit my social activity because I’m tired.....             | <input type="checkbox"/> |

11. In the last 4 weeks, because of your vision, how much difficulty do you have with the following activities? is difficult to...  
*(Please put a cross in the box that best describes how much difficulty you have, even with glasses. If you do not perform the activity for reasons unrelated to your vision, cross the "n/a" box).*

|    |                                                                                      | n/a                      | None                     | A little                 | Moderate                 | Great deal               | Unable to do             |
|----|--------------------------------------------------------------------------------------|--------------------------|--------------------------|--------------------------|--------------------------|--------------------------|--------------------------|
| 1  | Reading small print, such as medicine bottle labels, a telephone book or food labels | <input type="checkbox"/> |
| 2  | Reading a newspaper or a book                                                        | <input type="checkbox"/> |
| 3  | Reading a large-print book or large-print newspaper or numbers on a telephone        | <input type="checkbox"/> |
| 4  | Recognising people when they are close to                                            | <input type="checkbox"/> |
| 5  | Seeing steps, stairs or curbs                                                        | <input type="checkbox"/> |
| 6  | Reading traffic signs, street signs or store                                         | <input type="checkbox"/> |
| 7  | Doing fine handwork like sewing, knitting, crocheting, carpentry                     | <input type="checkbox"/> |
| 8  | Writing cheques or filling out forms                                                 | <input type="checkbox"/> |
| 9  | Playing games such as bingo, dominos or card games                                   | <input type="checkbox"/> |
| 10 | Taking part in sports like bowling, tennis, golf                                     | <input type="checkbox"/> |
| 11 | Cooking                                                                              | <input type="checkbox"/> |
| 12 | Watching television                                                                  | <input type="checkbox"/> |
| 13 | Driving during the day                                                               | <input type="checkbox"/> |
| 14 | Driving at night                                                                     | <input type="checkbox"/> |

12. Has a doctor ever told you that you have any of the following.....  
*(Please put a cross in as many boxes that apply to you)*

- a Acid reflux / indigestion / stomach ulcer.....
- b Diabetes.....
- c Polymyalgia rheumatica (PMR).....
- d Heart disease.....
- e High blood pressure.....
- f High cholesterol.....
- g Osteoporosis.....
- h Stroke.....
- i Cataracts.....
- j Glaucoma.....
- k Heart attack.....
- l Cancer.....
- m Osteoarthritis.....

## Section F: Questions about your priorities for GCA research

---

This section is about what you think are the most important things that should be researched in GCA.

1. What in your opinion are the most important things that should be researched in GCA?  
*(Please put a cross next to your **3** most important.)*

- |                                     |                          |                                                       |                          |
|-------------------------------------|--------------------------|-------------------------------------------------------|--------------------------|
| a Accurate and timely diagnosis     | <input type="checkbox"/> | f Alternative and complementary therapies             | <input type="checkbox"/> |
| b Steroid Management                | <input type="checkbox"/> | g Roles of health professionals                       | <input type="checkbox"/> |
| c How giant cell arteritis develops | <input type="checkbox"/> | h Things patients with GCA can do for their condition | <input type="checkbox"/> |
| d Pain, stiffness and fatigue       | <input type="checkbox"/> | i Multiple health conditions                          | <input type="checkbox"/> |
| e Avoiding steroid complications    | <input type="checkbox"/> | j Other, please specify.....                          | <input type="checkbox"/> |
|                                     |                          | .....                                                 |                          |

## Section G: Questions about you

---

This section contains some questions about you.

1. What is your date of birth?  
(e.g. 1<sup>st</sup> March 1930 would be 01 / 03 / 1930)

|  |  |   |  |  |   |    |  |  |
|--|--|---|--|--|---|----|--|--|
|  |  | / |  |  | / | 19 |  |  |
|--|--|---|--|--|---|----|--|--|

- 2a. What is your weight now?

|  |  |        |  |  |     |    |  |  |  |     |
|--|--|--------|--|--|-----|----|--|--|--|-----|
|  |  | stones |  |  | lbs | or |  |  |  | kgs |
|--|--|--------|--|--|-----|----|--|--|--|-----|

- 2b. What is your height?

|  |      |  |  |        |    |  |  |  |     |
|--|------|--|--|--------|----|--|--|--|-----|
|  | feet |  |  | inches | or |  |  |  | cms |
|--|------|--|--|--------|----|--|--|--|-----|

3. Are you:

Male.....       Female.....

4. Which ethnic group do you consider yourself to belong to?  
(Please put a cross in one box only)

|                          |                          |                                          |                          |
|--------------------------|--------------------------|------------------------------------------|--------------------------|
| White.....               | <input type="checkbox"/> | Black/African/Caribbean/Black British... | <input type="checkbox"/> |
| Asian/Asian British..... | <input type="checkbox"/> | Mixed/multiple ethnic groups.....        | <input type="checkbox"/> |
| Other.....               | <input type="checkbox"/> |                                          |                          |

5. What is your current employment status?  
(Please put a cross in one box only)

|               |                          |                                    |                          |                        |                          |
|---------------|--------------------------|------------------------------------|--------------------------|------------------------|--------------------------|
| Employed..... | <input type="checkbox"/> | Unemployed or seeking work.....    | <input type="checkbox"/> | Housewife/Husband..... | <input type="checkbox"/> |
| Retired.....  | <input type="checkbox"/> | Not working due to ill health..... | <input type="checkbox"/> | Other.....             | <input type="checkbox"/> |

6. If you are working, what is your job title, or if you are not working, or are retired, what job did you do for most of your working life?

.....

7. What is your current smoking status?  
(Please put a cross in one box only)

|                          |                          |                          |
|--------------------------|--------------------------|--------------------------|
| Never smoked             | Previously smoked        | Currently smoking        |
| <input type="checkbox"/> | <input type="checkbox"/> | <input type="checkbox"/> |

8. About how often do you drink alcohol?  
(Please put a cross in one box only)

|                          |                          |                          |                          |                          |                          |
|--------------------------|--------------------------|--------------------------|--------------------------|--------------------------|--------------------------|
| Daily or almost daily    | 3 or 4 times a week      | Once or twice a week     | 1 to 3 times a month     | Special occasions only   | Never                    |
| <input type="checkbox"/> |

9. Do you currently live alone?

Yes..... No.....

10. What is your current marital status?  
(Please put a cross in one box only)

|                          |                          |                          |                          |                          |                          |
|--------------------------|--------------------------|--------------------------|--------------------------|--------------------------|--------------------------|
| Married                  | Separated                | Divorced                 | Widowed                  | Cohabiting               | Single                   |
| <input type="checkbox"/> |

11. In the last month, how much did your GCA symptoms affect your intimate or sexual relationships?  
(Please put a cross in one box only)

|                            |                          |                          |                          |                          |                          |
|----------------------------|--------------------------|--------------------------|--------------------------|--------------------------|--------------------------|
| Does not<br>apply to<br>me | Not at all               | A little bit             | Moderately               | Quite a bit              | Extremely                |
| <input type="checkbox"/>   | <input type="checkbox"/> | <input type="checkbox"/> | <input type="checkbox"/> | <input type="checkbox"/> | <input type="checkbox"/> |

**This is the end of the questions**

**Thank you for taking the time to fill in this questionnaire.**

We assure you that any information will be held in the strictest confidence.

**Please return this questionnaire and signed consent form (Section H) in the prepaid envelope provided. You do not need a stamp.** If you have any questions about this questionnaire or the study in general, please contact the **Study Coordinator, Sarah Lawton** on **01782 734965** during office hours or email [s.a.lawton@keele.ac.uk](mailto:s.a.lawton@keele.ac.uk)

**Thank you very much for your help.**

ID number:

## Section H: Continuing to help with this study

---

**Thank you for completing this questionnaire.**

Please ensure that you have read the enclosed Participant Information Sheet (version 1.0, dated 10/10/14) that explains the study in detail.

**Please read and complete the following consent form, and then sign below.**

### Consent form

Please answer each statement by putting a cross in the appropriate box on each line.

|                                                                                                                                                                                                                                                                                                                                      | Yes                      | No                       |
|--------------------------------------------------------------------------------------------------------------------------------------------------------------------------------------------------------------------------------------------------------------------------------------------------------------------------------------|--------------------------|--------------------------|
| I confirm that I have read and understood the study Participant Information Sheet (version 1.0, dated 10/10/14), and I am willing to take part in the study.                                                                                                                                                                         | <input type="checkbox"/> | <input type="checkbox"/> |
| I understand that I can withdraw from the study at any time, and that this will not affect the care I receive in any way.                                                                                                                                                                                                            | <input type="checkbox"/> | <input type="checkbox"/> |
| I understand that relevant sections of my medical notes and data collected during the study may be looked at by individuals from Keele University, from regulatory authorities or from the NHS Trust, where it is relevant to my taking part in this research. I give permission for these individuals to have access to my records. | <input type="checkbox"/> | <input type="checkbox"/> |
| I understand that I can withdraw from the study at any time, and that this will not affect the care I receive in any way.                                                                                                                                                                                                            | <input type="checkbox"/> | <input type="checkbox"/> |
| I give my consent to be contacted again about related studies.                                                                                                                                                                                                                                                                       | <input type="checkbox"/> | <input type="checkbox"/> |

Signed..... Date.....

### **Please print your name and address**

|                |       |                  |       |           |       |
|----------------|-------|------------------|-------|-----------|-------|
| Title          | _____ | First name       | _____ | Last name | _____ |
| Address line 1 | _____ |                  |       |           |       |
| Address line 2 | _____ |                  |       |           |       |
| Town           | _____ | County           | _____ |           |       |
| Postcode       | _____ | Telephone number | _____ |           |       |

**Even if you would prefer us not to review your medical records, the answers you have given in this questionnaire will still be very important to us.**

**Please return your questionnaire in the FREEPOST (no stamp needed) envelope provided.**

**Thank you for your help with this research project.**

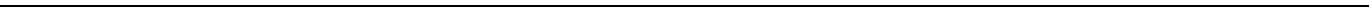

|            |
|------------|
| ID number: |
|------------|
